# Supplementary material for: Engagement of private health care facilities in TB management in Lusaka district of Zambia: lessons learned and achievements
Source: PubMed Central journal article supplement (PMC10941462; doi:10.1186/s12889-024-18285-4), 2024-03-14
Supplement: 12889_2024_18285_MOESM1_ESM.pdf [file 12889_2024_18285_MOESM1_ESM.pdf]

# TBLON

## BASELINE ASSESSMENT TOOL

| PROFILE |                                                |                               |
|---------|------------------------------------------------|-------------------------------|
| 1.      | Date                                           | DD/ MM/YY                     |
| 2.      | Province                                       |                               |
| 3.      | District                                       |                               |
| 4.      | Facility Name                                  |                               |
| 5.      | Facility type<br>(Tick all options that apply) | Public                        |
|         |                                                | Private                       |
|         |                                                | Diagnostic                    |
|         |                                                | Treatment                     |
|         |                                                | Hospital                      |
|         |                                                | Clinic                        |
|         |                                                | Health post                   |
|         |                                                | MDR/RR TB initiating facility |
|         | MDR/RR DOT facility                            |                               |
| 6.      | Geo coordinates                                |                               |
| 7.      | SmartCare code                                 |                               |
| 8.      | Distance from DHO                              |                               |
| 9.      | Catchment population<br>(2022)                 |                               |

| HUMAN RESOURCE CAPACITY FOR TB SERVICE PROVISION |                                                           |                |                                     |
|--------------------------------------------------|-----------------------------------------------------------|----------------|-------------------------------------|
| HUMAN RESOURCE AT THE FACILITY                   |                                                           | NUMBER         | COMMENT                             |
| 10.                                              | Medical Doctors                                           |                |                                     |
| 11.                                              | Medical Licentiates                                       |                |                                     |
| 12.                                              | Clinical Officers                                         |                |                                     |
| 13.                                              | Nurses                                                    |                |                                     |
| 14.                                              | Pharmacy personnel                                        |                |                                     |
| 15.                                              | Laboratory personnel                                      |                |                                     |
| 16.                                              | Environmental Health Technologist                         |                |                                     |
| 17.                                              | Data clerks/associates                                    |                |                                     |
| 18.                                              | Nutritionist                                              |                |                                     |
| 19.                                              | Social workers                                            |                |                                     |
| 20.                                              | General workers                                           |                |                                     |
| 21.                                              | Community HCWs                                            |                |                                     |
| 22.                                              | Psychosocial counselor                                    |                |                                     |
| 23.                                              | Other                                                     |                |                                     |
| TRAININGS AND ORIENTATIONS                       |                                                           | NUMBER TRAINED | POSITIONS OF STAFF TRAINED/ORIENTED |
| 24.                                              | Adult TB training                                         |                |                                     |
| 25.                                              | Pediatric TB training                                     |                |                                     |
| 26.                                              | MDR TB training                                           |                |                                     |
| 27.                                              | Community Health workers training                         |                |                                     |
| 28.                                              | Orientation/training on radiological diagnosis of TB      |                |                                     |
| 29.                                              | Orientation/ training in Drug surveillance and monitoring |                |                                     |
| 30.                                              | Orientation/training in active TB case finding            |                |                                     |
| 31.                                              | Orientation/training in TB infection control              |                |                                     |

|     |                                               |  |  |
|-----|-----------------------------------------------|--|--|
| 32. | Orientation/training in TB preventive therapy |  |  |
| 33. | Laboratory TB Training                        |  |  |

|     | <b>TB/ ART SERVICES</b>                                                                                                         | <b>AVAILABILITY</b>                         |       |
|-----|---------------------------------------------------------------------------------------------------------------------------------|---------------------------------------------|-------|
| 34. | TB/ ART Integration- One stop TB/HIV clinic                                                                                     | [ Y ]                                       | [ N ] |
|     | <b>Infection Control Measures in place</b>                                                                                      |                                             |       |
| 35. | <i>An infection control committee in place</i>                                                                                  | [ Y ]                                       | [ N ] |
| 36. | <i>A written site – specific infection control (IC) plan in place</i>                                                           | [ Y ]                                       | [ N ] |
| 37. | <i>Designated sputum collection area</i>                                                                                        | [ Y ]                                       | [ N ] |
| 38. | <i>Open waiting space</i>                                                                                                       | [ Y ]                                       | [ N ] |
| 39. | <i>Average waiting time for diagnosed TB patients at the TB clinic</i>                                                          |                                             |       |
| 40. | <i>Is health education conducted daily at the TB clinic</i>                                                                     | [ Y ]                                       | [ N ] |
| 41. | <i>If not, how often is health education provided</i>                                                                           | [0] never                                   |       |
|     |                                                                                                                                 | [1] monthly                                 |       |
|     |                                                                                                                                 | [2] every 2 weeks                           |       |
|     |                                                                                                                                 | [3] weekly                                  |       |
|     |                                                                                                                                 | [4] every 2-4 days                          |       |
| 42. | <i>Are the topics for health education documented</i>                                                                           | [ Y ]                                       | [ N ] |
| 43. | <i>If yes, what areas are covered at least every week-refer to records on health education(tick all that apply)</i>             | Adherence to treatment                      |       |
|     |                                                                                                                                 | Sputum handling and disposal                |       |
|     |                                                                                                                                 | Contact tracing                             |       |
|     |                                                                                                                                 | Diet                                        |       |
|     |                                                                                                                                 | Keeping windows open                        |       |
|     |                                                                                                                                 | Reporting of adverse effects                |       |
|     |                                                                                                                                 | Other (specify)                             |       |
| 44. | <i>Is health education on TB symptoms and early health seeking behavior provided at other departments (tick all that apply)</i> | OPD                                         |       |
|     |                                                                                                                                 | ART                                         |       |
|     |                                                                                                                                 | MCH                                         |       |
|     |                                                                                                                                 | Nutrition                                   |       |
|     |                                                                                                                                 | Other                                       |       |
| 45. | <i>If yes, on average, how frequently is health education provided to all the departments TB</i>                                | [1] monthly                                 |       |
|     |                                                                                                                                 | [2] every 2 weeks                           |       |
|     |                                                                                                                                 | [3] weekly                                  |       |
|     |                                                                                                                                 | [4] every 2-4 days                          |       |
| 46. | <i>Are MDR TB patients separated from drug susceptible TB patients</i>                                                          | [ Y ]                                       | [ N ] |
| 47. | <i>If yes, how are they separated</i>                                                                                           | They are seen in different clinic areas     |       |
|     |                                                                                                                                 | They are seen at different hours of the day |       |
|     |                                                                                                                                 | They are seen on different days             |       |
|     |                                                                                                                                 | Other (specify)                             |       |

|     |                                                         |       |       |
|-----|---------------------------------------------------------|-------|-------|
| 48. | TB/HIV coordinating body in place (minutes of meetings) | [ Y ] | [ N ] |
|-----|---------------------------------------------------------|-------|-------|

| <b>ENABLERS FOR SERVICE PROVISION</b> (indicate either Yes or No, and record Quantities where Yes is ticked) |                                                              |              |       |          |
|--------------------------------------------------------------------------------------------------------------|--------------------------------------------------------------|--------------|-------|----------|
|                                                                                                              |                                                              | AVAILABILITY |       | Quantity |
| <b>MEDICAL SUPPLIES</b>                                                                                      |                                                              |              |       |          |
| 49.                                                                                                          | Weighing scale                                               | [ Y ]        | [ N ] |          |
| 50.                                                                                                          | BP Machine                                                   | [ Y ]        | [ N ] |          |
| 51.                                                                                                          | Stethoscope                                                  | [ Y ]        | [ N ] |          |
| 52.                                                                                                          | Pulse oximeter                                               | [ Y ]        | [ N ] |          |
| 53.                                                                                                          | Thermometer                                                  | [ Y ]        | [ N ] |          |
| 54.                                                                                                          | Phone                                                        | [ Y ]        | [ N ] |          |
| 55.                                                                                                          | Filling Cabinets                                             | [ Y ]        | [ N ] |          |
| 56.                                                                                                          | Cooler boxes                                                 | [ Y ]        | [ N ] |          |
| 57.                                                                                                          | Specimen bags                                                | [ Y ]        | [ N ] |          |
| 58.                                                                                                          | Consistent supply chain for sputum bottles                   | [ Y ]        | [ N ] |          |
| 59.                                                                                                          | Consistent supply chain for sharps boxes                     | [ Y ]        | [ N ] |          |
| 60.                                                                                                          | Consistent supply chain for gloves                           | [ Y ]        | [ N ] |          |
| 61.                                                                                                          | Face masks                                                   | [ Y ]        | [ N ] |          |
| 62.                                                                                                          | N95 respirators                                              | [ Y ]        | [ N ] |          |
| 63.                                                                                                          | Handwashing equipment                                        | [ Y ]        | [ N ] |          |
| 64.                                                                                                          | Stadiometers                                                 | [ Y ]        | [ N ] |          |
| 65.                                                                                                          | Hand wash soap                                               | [ Y ]        | [ N ] |          |
| <b>NTP GUIDELINES</b>                                                                                        |                                                              |              |       |          |
| 66.                                                                                                          | Childhood TB                                                 | [ Y ]        | [ N ] |          |
| 67.                                                                                                          | TB manual                                                    | [ Y ]        | [ N ] |          |
| 68.                                                                                                          | MDR TB                                                       | [ Y ]        | [ N ] |          |
| 69.                                                                                                          | Consolidated TB guidelines                                   | [ Y ]        | [ N ] |          |
| 70.                                                                                                          | Consolidate National HIV treatment and prevention guidelines | [ Y ]        | [ N ] |          |
| 71.                                                                                                          | TPT                                                          | [ Y ]        | [ N ] |          |
| 72.                                                                                                          | TB infection control                                         | [ Y ]        | [ N ] |          |
| <b>JOB AIDS</b>                                                                                              |                                                              |              |       |          |
| 73.                                                                                                          | Childhood TB                                                 | [ Y ]        | [ N ] |          |
| 74.                                                                                                          | Adult TB                                                     | [ Y ]        | [ N ] |          |
| 75.                                                                                                          | MDR TB                                                       | [ Y ]        | [ N ] |          |
| 76.                                                                                                          | TPT                                                          | [ Y ]        | [ N ] |          |
| 77.                                                                                                          | TB infection control                                         | [ Y ]        | [ N ] |          |
| 78.                                                                                                          | TB/COVID                                                     | [ Y ]        | [ N ] |          |
| 79.                                                                                                          | TB/HIV                                                       | [ Y ]        | [ N ] |          |
| <b>IEC MATERIALS</b>                                                                                         |                                                              |              |       |          |
| 80.                                                                                                          | Childhood TB                                                 | [ Y ]        | [ N ] |          |
| 81.                                                                                                          | Adult TB                                                     | [ Y ]        | [ N ] |          |

|     |                      |       |       |  |
|-----|----------------------|-------|-------|--|
| 82. | TB/HIV               | [ Y ] | [ N ] |  |
| 83. | MDR TB               | [ Y ] | [ N ] |  |
| 84. | TPT                  | [ Y ] | [ N ] |  |
| 85. | TB infection control | [ Y ] | [ N ] |  |
| 86. | TB/COVID             | [ Y ] | [ N ] |  |

| A   | Electronic patient record/SmartCare Assessment                                              | Response            |                          | Comments                       |
|-----|---------------------------------------------------------------------------------------------|---------------------|--------------------------|--------------------------------|
| 87. | Does this facility have SmartCare?                                                          | [ Y ]               | [ N ]                    |                                |
| 88. | If No to question 82:<br>Any reasons why SmartCare is not in use?                           | Not yet Deployed    | <input type="checkbox"/> | Reason Smartcare isn't working |
|     |                                                                                             | Not Working         | <input type="checkbox"/> |                                |
|     |                                                                                             | Staff not Trained   | <input type="checkbox"/> |                                |
| 89. | If Yes to question 82:<br>Is the deployed SmartCare at the facility in eFirst or eLast?     | E-First             | <input type="checkbox"/> |                                |
|     |                                                                                             | E-Last              | <input type="checkbox"/> |                                |
| 90. | Is SmartCare being used in the TB clinic?                                                   | [ Y ]               | [ N ]                    |                                |
| 91. | If Yes to question 85: Is it being used in elast or efirst mode                             | E-First             | <input type="checkbox"/> |                                |
|     |                                                                                             | E-Last              | <input type="checkbox"/> |                                |
| 92. | If Yes to question 85: Are there sufficient computers in the TB clinic?                     | [ Y ]               | [ N ]                    |                                |
| 93. | If Yes to question 85: Who primarily enters the data?                                       | Data Associate      | <input type="checkbox"/> |                                |
|     |                                                                                             | Clinician           | <input type="checkbox"/> |                                |
|     |                                                                                             | Treatment Supporter | <input type="checkbox"/> |                                |
|     |                                                                                             | Volunteer           | <input type="checkbox"/> |                                |
|     |                                                                                             | Nurse               | <input type="checkbox"/> |                                |
|     |                                                                                             | Other               | <input type="checkbox"/> |                                |
| 94. | If No to question 85: Any reason why?                                                       | Not yet Deployed    | <input type="checkbox"/> | Reason Smartcare isn't working |
|     |                                                                                             | Not Working         | <input type="checkbox"/> |                                |
|     |                                                                                             | Staff not Trained   | <input type="checkbox"/> |                                |
| 95. | Are the SmartCare computers using the latest version of SmartCare? (to specify the version) | [ Y ]               | [ N ]                    |                                |
| 96. | Do they have anti-virus software on them that is up to date?                                | [ Y ]               | [ N ]                    |                                |
| 97. | What kind of network do the computers connect to?                                           | WIFI                | <input type="checkbox"/> |                                |
|     |                                                                                             | Wired LAN           | <input type="checkbox"/> |                                |
| 98. | Are the computers connected to a power backup system?                                       | Solar               | <input type="checkbox"/> |                                |
|     |                                                                                             | UPS                 | <input type="checkbox"/> |                                |
|     |                                                                                             | Inverter w/o Solar  | <input type="checkbox"/> |                                |
|     |                                                                                             | Generator           | <input type="checkbox"/> |                                |

|          |                                                                               |                                                                |                                                                                                                                          |          |
|----------|-------------------------------------------------------------------------------|----------------------------------------------------------------|------------------------------------------------------------------------------------------------------------------------------------------|----------|
|          |                                                                               |                                                                |                                                                                                                                          |          |
| 99.      | Are the staff at the site trained in the use of SmartCare?                    | [ Y ]                                                          | [ N ]                                                                                                                                    |          |
| 100.     | If Yes: How many?                                                             |                                                                |                                                                                                                                          |          |
| 101.     | If No: How many staff need training in SmartCare                              |                                                                |                                                                                                                                          |          |
| 102.     | Are there any staff trained in SmartCare troubleshooting                      | [ Y ]                                                          | [ N ]                                                                                                                                    |          |
| 103.     | Does this facility have YATHU?                                                | [ Y ]                                                          | [ N ]                                                                                                                                    |          |
| 104.     | Does this facility have any other patient data recording system?              | [ Y ]                                                          | [ N ]                                                                                                                                    |          |
| <b>B</b> | <b>M&amp;E Processes</b>                                                      |                                                                |                                                                                                                                          |          |
|          | Are the following data sources are available?                                 |                                                                |                                                                                                                                          | Quantity |
| 105.     | Presumptive TB register                                                       | [ Y ]                                                          | [ N ]                                                                                                                                    |          |
| 106.     | Community Presumptive TB register                                             | [ Y ]                                                          | [ N ]                                                                                                                                    |          |
| 107.     | Contact tracing forms                                                         | [ Y ]                                                          | [ N ]                                                                                                                                    |          |
| 108.     | Contact tracing register                                                      | [ Y ]                                                          | [ N ]                                                                                                                                    |          |
| 109.     | TPT register                                                                  | [ Y ]                                                          | [ N ]                                                                                                                                    |          |
| 110.     | TB treatment cards                                                            | [ Y ]                                                          | [ N ]                                                                                                                                    |          |
| 111.     | TB ID cards                                                                   | [ Y ]                                                          | [ N ]                                                                                                                                    |          |
| 112.     | TB treatment register                                                         | [ Y ]                                                          | [ N ]                                                                                                                                    |          |
| 113.     | Request for bacteriological examination of sputum                             | [ Y ]                                                          | [ N ]                                                                                                                                    |          |
| 114.     | Request form for culture and DST                                              | [ Y ]                                                          | [ N ]                                                                                                                                    |          |
| 115.     | TB laboratory register                                                        | [ Y ]                                                          | [ N ]                                                                                                                                    |          |
| 116.     | MDR TB treatment card                                                         | [ Y ]                                                          | [ N ]                                                                                                                                    |          |
| 117.     | MDR TB treatment register                                                     | [ Y ]                                                          | [ N ]                                                                                                                                    |          |
| 118.     | Culture sample/results register                                               | [ Y ]                                                          | [ N ]                                                                                                                                    |          |
| 119.     | TB appointment register                                                       | [ Y ]                                                          | [ N ]                                                                                                                                    |          |
| 120.     | Transfer forms                                                                | [ Y ]                                                          | [ N ]                                                                                                                                    |          |
| 121.     | Mortality audit forms (TB death review forms)                                 | [ Y ]                                                          | [ N ]                                                                                                                                    |          |
| 122.     | Do you have any other registers apart from the ones listed here?              | [ Y ]                                                          | [ N ]                                                                                                                                    |          |
| 123.     | Who is responsible for recording data in the register/data sources?           | Data Associate<br>Clinician<br>Nurses<br>Volunteer/TS<br>Other | <input type="checkbox"/><br><input type="checkbox"/><br><input type="checkbox"/><br><input type="checkbox"/><br><input type="checkbox"/> |          |
| 124.     | What challenges are there when recording data in the registers/ data sources? |                                                                |                                                                                                                                          |          |
| 125.     | Who is responsible for compiling the reports?                                 | Data Associate<br>Clinician<br>Nurses<br>Volunteer<br>Other    | <input type="checkbox"/><br><input type="checkbox"/><br><input type="checkbox"/><br><input type="checkbox"/><br><input type="checkbox"/> |          |
| 126.     | Who is responsible for reviewing aggregate data before its submitted?         | Data Associate<br>Clinician<br>Nurses<br>Volunteer<br>Other    | <input type="checkbox"/><br><input type="checkbox"/><br><input type="checkbox"/><br><input type="checkbox"/><br><input type="checkbox"/> |          |
| 127.     | Who is responsible for submitting the reports?                                | Data Associate<br>In-charge                                    | <input type="checkbox"/><br><input type="checkbox"/>                                                                                     |          |

|             |                                                                                                                                                                | Clinician | Nurses                   | Volunteer                | Other                    |
|-------------|----------------------------------------------------------------------------------------------------------------------------------------------------------------|-----------|--------------------------|--------------------------|--------------------------|
| 128.        | Can you provide templates of reports?                                                                                                                          | [ Y ]     | [ N ]                    | <input type="checkbox"/> | <input type="checkbox"/> |
| 129.        | Are all the TB relevant staff trained in HMIS?                                                                                                                 | [ Y ]     | [ N ]                    | <input type="checkbox"/> | <input type="checkbox"/> |
| 130.        | How do you ensure that the numbers entered are accurate and complete?                                                                                          |           |                          | <input type="checkbox"/> | <input type="checkbox"/> |
| <b>C</b>    | <b>Site has updated guidelines for reporting printed and easily accessible for reference</b>                                                                   |           |                          |                          |                          |
| 131.        | Does the site have printed copies of the most updated indicator guidance maintained by the designated facility staff member?                                   | [ Y ]     | [ N ]                    | <input type="checkbox"/> | <input type="checkbox"/> |
| 132.        | Does the site have a comprehensive list of fiscal year targets posted and visible at TB Department? <b>If yes, document facility target on TB notification</b> | [ Y ]     | [ N ]                    | <input type="checkbox"/> | <input type="checkbox"/> |
| 133.        | Does the site have job-aids of indicator definitions posted and visible at TB department?                                                                      | [ Y ]     | [ N ]                    | <input type="checkbox"/> | <input type="checkbox"/> |
| 134.        | Does the site have the posted SOPs on steps for aggregating and reporting monthly and quarterly indicators?                                                    | [ Y ]     | [ N ]                    | <input type="checkbox"/> | <input type="checkbox"/> |
| <b>D</b>    | <b>Site conducts data review on a regular basis</b>                                                                                                            |           |                          |                          |                          |
|             | Does the facility conduct data reviews on a regular basis prior to reporting?                                                                                  | [ Y ]     | [ N ]                    | <input type="checkbox"/> | <input type="checkbox"/> |
| 135.        | Is there documentation of these data reviews (i.e., meeting minutes)? (VISUALLY VERIFY)                                                                        | [ Y ]     | [ N ]                    | <input type="checkbox"/> | <input type="checkbox"/> |
| 136.        | Do facility staff and IP-staff participate in the development of data presentations for monthly and quarterly site-level data review meetings?                 | [ Y ]     | [ N ]                    | <input type="checkbox"/> | <input type="checkbox"/> |
| <b>137.</b> | Are action plans developed and revisited during these meetings? (VISUALLY VERIFY)                                                                              | [ Y ]     | [ N ]                    | <input type="checkbox"/> | <input type="checkbox"/> |
| 138.        | Does the site reconcile monthly results across different data aggregation tools (i.e., between Registers, SmartCare MER and HIA2 reports)?                     | [ Y ]     | [ N ]                    | <input type="checkbox"/> | <input type="checkbox"/> |
| 139.        | Is there documented evidence of reconciliation available at the clinic (e.g., meeting minutes, results of cross-checks, etc)?                                  | [ Y ]     | [ N ]                    | <input type="checkbox"/> | <input type="checkbox"/> |
| 140.        | Is there evidence of TB data use at facility level in the past 12 months (existence of graphs, charts or periodic data review reports)?                        | [ Y ]     | [ N ]                    | <input type="checkbox"/> | <input type="checkbox"/> |
| 141.        | Does the facility conduct TB mortality reviews (TB death reviews)?                                                                                             | [ Y ]     | [ N ]                    | <input type="checkbox"/> | <input type="checkbox"/> |
| 142.        | If yes to Q141, how often is it done                                                                                                                           | Monthly   | <input type="checkbox"/> | Quarterly                | <input type="checkbox"/> |
| 143.        | If yes to Q141 how is it done?                                                                                                                                 |           |                          |                          |                          |

| LAB DIAGNOSTIC SERVICES                                                   |           |       |       |            |
|---------------------------------------------------------------------------|-----------|-------|-------|------------|
| LAB EQUIPMENT AND SUPPLIES (Skip this section if not diagnostic facility) |           |       |       |            |
| 144.                                                                      | GeneXpert | [ Y ] | [ N ] | Microscopy |

|      |                                                                                 |                                                                                                                                                                                                                                                                      |       |                                          |                                                                                                                                                                                                                                                                      |       |
|------|---------------------------------------------------------------------------------|----------------------------------------------------------------------------------------------------------------------------------------------------------------------------------------------------------------------------------------------------------------------|-------|------------------------------------------|----------------------------------------------------------------------------------------------------------------------------------------------------------------------------------------------------------------------------------------------------------------------|-------|
| 145. | No of modules                                                                   | Skip if not Xpert on site                                                                                                                                                                                                                                            |       | Fluorescent Microscope                   | [ Y ]                                                                                                                                                                                                                                                                | [ N ] |
| 146. | No of functional modules                                                        |                                                                                                                                                                                                                                                                      |       | ZN microscope                            | [ Y ]                                                                                                                                                                                                                                                                | [ N ] |
| 147. | What type of laboratory information system being used for TB in the laboratory? | [1] DISA<br>[2] eLabs<br>[3] Other, specify _____<br>_____                                                                                                                                                                                                           |       |                                          |                                                                                                                                                                                                                                                                      |       |
|      |                                                                                 | Skip if not available on site                                                                                                                                                                                                                                        |       |                                          |                                                                                                                                                                                                                                                                      |       |
| 148. | Does DISA transmit TB results electronically to clinicians?                     | Skip if not available on site                                                                                                                                                                                                                                        |       |                                          |                                                                                                                                                                                                                                                                      |       |
| 149. | Does eLabs transmit TB results electronically to clinicians?                    | Skip if not available on site                                                                                                                                                                                                                                        |       |                                          |                                                                                                                                                                                                                                                                      |       |
| 150. | Internet connectivity                                                           | [ Y ]                                                                                                                                                                                                                                                                | [ N ] |                                          |                                                                                                                                                                                                                                                                      |       |
| 151. | Does the facility use TB LAMP?                                                  | [ Y ]                                                                                                                                                                                                                                                                | [ N ] |                                          |                                                                                                                                                                                                                                                                      |       |
| 152. | Does the facility use TB LAM?                                                   | [ Y ]                                                                                                                                                                                                                                                                | [ N ] |                                          |                                                                                                                                                                                                                                                                      |       |
| 153. | Is the Back-up power solution available?                                        | [ Y ]                                                                                                                                                                                                                                                                | [ N ] | [ Y ]                                    |                                                                                                                                                                                                                                                                      | [ N ] |
| 154. | Date of last EQA for smear microscopy                                           | DD/MM/YYYY                                                                                                                                                                                                                                                           |       | DD/MM/YYYY                               |                                                                                                                                                                                                                                                                      |       |
| 155. | State the results of last smear microscopy EQA                                  |                                                                                                                                                                                                                                                                      |       |                                          |                                                                                                                                                                                                                                                                      |       |
| 156. | Date of the last proficiency testing for GeneXpert                              | DD/MM/YYYY                                                                                                                                                                                                                                                           |       |                                          |                                                                                                                                                                                                                                                                      |       |
| 157. | State the results of last GeneXpert proficiency testing (EQA)                   |                                                                                                                                                                                                                                                                      |       |                                          |                                                                                                                                                                                                                                                                      |       |
| 158. | Consistent supply of cartridges                                                 | [ Y ]                                                                                                                                                                                                                                                                | [ N ] | Consistent supply of microscopy reagents | [ Y ]                                                                                                                                                                                                                                                                | [ N ] |
| 159. | If no, when was the last stock out?                                             |                                                                                                                                                                                                                                                                      |       |                                          |                                                                                                                                                                                                                                                                      |       |
| 160. | How long did it last?                                                           |                                                                                                                                                                                                                                                                      |       |                                          |                                                                                                                                                                                                                                                                      |       |
| 161. | What was the cause of the stock out?                                            | [1] laboratory didn't place an order<br>[2] laboratory placed an order late<br>[3] poor quantification by the laboratory<br>[4] order placed; district store supplied less than requested<br>[5] order placed, no supply from district store<br>[6] Reagents expired |       |                                          | [1] laboratory didn't place an order<br>[2] laboratory placed an order late<br>[3] poor quantification by the laboratory<br>[4] order placed; district store supplied less than requested<br>[5] order placed, no supply from district store<br>[6] Reagents expired |       |

| <b>COURIER SYSTEM</b> |                                                                                                           |                                                                                                                |       |
|-----------------------|-----------------------------------------------------------------------------------------------------------|----------------------------------------------------------------------------------------------------------------|-------|
| 162.                  | What is the frequency of courier system at the facility?                                                  | [0] Never<br>[1] Quarterly<br>[2] Monthly<br>[3] Weekly<br>[4] twice a week<br>[5] Daily<br>[6] Call on demand |       |
| 163.                  | Is the TB courier system integrated with other programs? (e.g. HIV)                                       | [Yes]                                                                                                          | [No]  |
| 164.                  | Which institution is supporting the current intra district courier system?                                | 1] PHO<br>2] DHO<br>3] Facility<br>4] IP, specify: _____                                                       |       |
| 165.                  | Are the courier system packaging, transportation materials available?                                     | [Yes]                                                                                                          | [No]  |
| 166.                  | What is the average turnaround time of TB results for sample courier? (Randomly sample 30 recent results) |                                                                                                                |       |
| 167.                  | Have you ever sent to send a sample to the culture laboratories?                                          | [ Y ]                                                                                                          | [ N ] |
| 168.                  | If yes, how easy is it (was it) to have a sputum sample transported to the culture laboratories?          | [1] Very easy<br>[2] Easy<br>[3] Difficult<br>[4] Very difficult                                               |       |
| 169.                  | How is(was) the sample sent to the culture laboratory?<br>(tick all that apply)                           | [1] Through the province<br>[2] Through the district<br>[3] Through partners<br>[4] Using public means         |       |
| 170.                  | On average, how long does it (did it) take you to receive the results?                                    | [0] Results were not received<br>[1] 2-3 months<br>[2] 3-4 months                                              |       |
| 171.                  | If diagnostic center, how many facilities send samples for processing?                                    |                                                                                                                |       |

| <b>RADIOLOGY (X-RAY) SERVICES</b> |                                                                                              |                                                                                                      |         |
|-----------------------------------|----------------------------------------------------------------------------------------------|------------------------------------------------------------------------------------------------------|---------|
| 172.                              | Does your facility have an X-ray machine?                                                    | [ Y ]                                                                                                | [ N ]   |
| 173.                              | If yes what type of machine is available                                                     | analogue                                                                                             | digital |
| 174.                              | Is the X-ray machine functional                                                              | [ Y ]                                                                                                | [ N ]   |
| 175.                              | Is there someone who knows how to read the obtained radiographic images? (tick)              | A radiologist                                                                                        |         |
|                                   |                                                                                              | A radiographer                                                                                       |         |
|                                   |                                                                                              | A radiology technologist                                                                             |         |
|                                   |                                                                                              | A trained clinician (medical officer, clinical officer, nurse, other)                                |         |
| 176.                              | If there is no one able to read/interpret the radiographic images, what happens then? (tick) | Radiographs transmitted electronically to a radiologist or other experienced reader at a remote site |         |
|                                   |                                                                                              | Radiographs physically transmitted to a radiologist or other experienced reader at a remote site     |         |



|      |                                                                                   |                 |       |
|------|-----------------------------------------------------------------------------------|-----------------|-------|
|      |                                                                                   | Other (specify) |       |
| 177. | Do you use any artificial intelligent system to interpret the images (e.g CAD4TB) | [ Y ]           | [ N ] |
| 178. | How frequent do you experience breakdown /machine does not work in a month        | weekly          |       |
|      |                                                                                   | Every two weeks |       |
|      |                                                                                   | One in a month  |       |
|      |                                                                                   |                 |       |
| 179. | Do patient pay for X-ray services?                                                | [ Y ]           | [ N ] |
| 180. | If patient pay, how much?                                                         | Less than K50   |       |
|      |                                                                                   | K50             |       |
|      |                                                                                   | K100            |       |
|      |                                                                                   | More Than K100  |       |
| 181. | If no X-ray machine, how far is the place with X-Ray services                     |                 |       |
| 182. | If patient pay, how much?                                                         | Less than K50   |       |
|      |                                                                                   | K50             |       |
|      |                                                                                   | K100            |       |
|      |                                                                                   | More Than K100  |       |

|      | <b>PUBLIC PRIVATE PARTNERSHIP</b>                                                                                                           | <b>AVAILABILITY</b> |       |
|------|---------------------------------------------------------------------------------------------------------------------------------------------|---------------------|-------|
|      | <b>Public facility only</b>                                                                                                                 |                     |       |
| 183. | Does the facility receive any referrals from private facilities to evaluate patients for TB?                                                | [ Y ]               | [ N ] |
| 184. | If yes to Q183 , which facilities do you usually receive referrals from(name them)                                                          |                     |       |
| 185. | If yes to Q183, does the facility provide feedback to the referring private facility when patient is received? (check evidence of feedback) | [ Y ]               | [ N ] |
| 186. | Does the TB treatment register have any TB cases whose entry point is private facility                                                      | [ Y ]               | [ N ] |
| 187. | If yes TO Q186, how many                                                                                                                    |                     |       |
|      | <b>Private facility only</b>                                                                                                                |                     |       |
| 188. | Does the facility refer any patients to public facilities?                                                                                  | [ Y ]               | [ N ] |
| 189. | If yes to Q188, what are the commonest reason for referral (tick all that apply)                                                            | Sputum examination  |       |
|      |                                                                                                                                             | Chest x-ray         |       |
|      |                                                                                                                                             | To start treatment  |       |
|      |                                                                                                                                             | Complications of TB |       |
| 190. | If yes to Q188, which facility do you usually refer patients to                                                                             |                     |       |
| 191. | Do you usually receive feedback from the site you refer patients to ?                                                                       | [ Y ]               | [ N ] |
| 192. | Do you sometimes receive referrals for treatment from other private facilities?                                                             | [ Y ]               | [ N ] |
| 193. | If yes, what are the commonest reasons or referral (tick all that apply)                                                                    | Sputum examination  |       |
|      |                                                                                                                                             | Chest x-ray         |       |
|      |                                                                                                                                             | To start treatment  |       |
|      |                                                                                                                                             | Complications of TB |       |
| 194. | What is the cost of x-ray at this facility (indicate not applicable if facility has no chest x-ray)                                         |                     |       |
| 195. | What is the cost of a GeneXpert at this facility(indicate not applicable if facility has no GeneXpert)                                      |                     |       |

|      |                                                                                                                                                  |       |       |         |
|------|--------------------------------------------------------------------------------------------------------------------------------------------------|-------|-------|---------|
| 196. | What is the cost of microscopy at this facility(indicate not applicable if facility doesn't offer TB microscopy)                                 |       |       |         |
| 197. | What is the cost of TB treatment at this facility(indicate not applicable if facility doesn't provide TB treatment)                              |       |       |         |
| 198. | Does the facility receive any Xpert cartridges from the Ministry of Health (indicate not applicable if facility has no GeneXpert)                | [ Y ] | [ N ] | [ N /A] |
| 199. | Does the facility receive any microscopy reagents from the Ministry of Health (indicate not applicable if facility does not offer TB microscopy) | [ Y ] | [ N ] | [ N /A] |
| 200. | Does the facility receive anti-TB drugs from the Ministry of Health ( indicate not applicable if facility doesn't provide TB treatment )         | [ Y ] | [ N ] | [ N /A] |

| <b>READINESS FOR DECENTRALISATION OF MDR TB SERVICES (includes questions not covered in other sections)</b> |                                                                                                         | <b>AVAILABILITY</b>                                                                                                                                                                                              |       |  |
|-------------------------------------------------------------------------------------------------------------|---------------------------------------------------------------------------------------------------------|------------------------------------------------------------------------------------------------------------------------------------------------------------------------------------------------------------------|-------|--|
|                                                                                                             | <b>Skip this section if the facility is not a hospital</b>                                              |                                                                                                                                                                                                                  |       |  |
| 201.                                                                                                        | Does the facility have an isolation ward                                                                | [ Y ]                                                                                                                                                                                                            | [ N ] |  |
| 202.                                                                                                        | If yes to Q201, how many beds are in the isolation ward?                                                |                                                                                                                                                                                                                  |       |  |
| 203.                                                                                                        | Does the facility has specialized treatment for chronic disease conditions (tick all that apply)        | [1] Hypertension<br>[2] Diabetes<br>[3] Respiratory conditions<br>[4] other (specify)                                                                                                                            |       |  |
| 204.                                                                                                        | What monitoring tests for TB and TB/HIV treatment is the facility able to provide (Tick all that apply) | [1] Chest x-ray<br>[2] Full Blood count<br>[3] Liver function tests<br>[4] Renal function tests and electrolytes<br>[5] Thyroid function tests<br>[6] CD4 count<br>[7] Viral load<br>[8] Electrocardiogram - ECG |       |  |
| 205.                                                                                                        | Does the facility have sufficient waiting area for TB patients                                          | [ Y ]                                                                                                                                                                                                            | [ N ] |  |
| 206.                                                                                                        | Does the facility have sufficient additional space for storage of DR-TB drugs                           | [ Y ]                                                                                                                                                                                                            | [ N ] |  |
| 207.                                                                                                        | Does the facility have electronic DR-TB register                                                        | [ Y ]                                                                                                                                                                                                            | [ N ] |  |
| 208.                                                                                                        | If yes, is anyone trained on the electronic DR-TB register                                              | [ Y ]                                                                                                                                                                                                            | [ N ] |  |

| <b>COMMUNITY ENGAGEMENT</b> |                                                                 | <b>AVAILABILITY</b>                |       |  |
|-----------------------------|-----------------------------------------------------------------|------------------------------------|-------|--|
| 209.                        | Does the facility conduct any TB community outreach activities? | [ Y ]                              | [ N ] |  |
| 210.                        | If yes to Q209, outline the activities                          | TB sensitization/Health education  |       |  |
|                             |                                                                 | Contact Tracing                    |       |  |
|                             |                                                                 | Defaulter tracing                  |       |  |
|                             |                                                                 | Follow up of patients (monitoring) |       |  |

|      |                                                                                                                              |                                                                                                                                                                        |       |
|------|------------------------------------------------------------------------------------------------------------------------------|------------------------------------------------------------------------------------------------------------------------------------------------------------------------|-------|
|      |                                                                                                                              | visit support groups/meetings                                                                                                                                          |       |
|      |                                                                                                                              | Other (specify)                                                                                                                                                        |       |
|      |                                                                                                                              | Other (specify)                                                                                                                                                        |       |
| 211. | If yes to Q, who funds the TB community outreach activities?                                                                 | MoH                                                                                                                                                                    |       |
|      |                                                                                                                              | CHAZ                                                                                                                                                                   |       |
|      |                                                                                                                              | MoH/GF                                                                                                                                                                 |       |
|      |                                                                                                                              | JSI                                                                                                                                                                    |       |
|      |                                                                                                                              | Right to Care                                                                                                                                                          |       |
|      |                                                                                                                              | CITAM+                                                                                                                                                                 |       |
|      |                                                                                                                              | AFYA                                                                                                                                                                   |       |
|      |                                                                                                                              | Jhiego                                                                                                                                                                 |       |
|      |                                                                                                                              | Other (specify)                                                                                                                                                        |       |
| 212. | Does the facility organize periodic community TB stakeholder's meetings?                                                     | [ Y ]                                                                                                                                                                  | [ N ] |
| 213. | If yes to Q4, how frequently?                                                                                                | [1] Monthly<br>[2] Quarterly<br>[3] Every six months<br>[4] Once a year                                                                                                |       |
| 214. | Does the facility have Community Based Volunteers that conduct Community Based TB Care activities attached to TB department? | [ Y ]                                                                                                                                                                  | [ N ] |
| 215. | How many community-based volunteers selected or engaged, if any?                                                             | Nil<br>1<br>2<br>3<br>4<br>5<br><5                                                                                                                                     |       |
| 216. | Does the facility have an active neighborhood health committee                                                               | [ Y ]                                                                                                                                                                  | [ N ] |
| 217. | What role does the NHC play on the TB program/activities                                                                     | Community sensitization<br>Monitoring of treatment<br>Compilation and submission of community reports<br>Identification and referral of presumptive<br>Contact tracing |       |
| 218. | Have the CBVs received any capacity building training?                                                                       | [ Y ]                                                                                                                                                                  | [ N ] |
| 219. | If yes to previous question, when were they last trained?                                                                    | This year<br>Last year<br>Two years ago<br>More than two years                                                                                                         |       |
| 220. | Who trained them?                                                                                                            | Facility<br>DHO<br>MoH/GF<br>ETB                                                                                                                                       |       |

|      |                                                                                             |                                                 |       |
|------|---------------------------------------------------------------------------------------------|-------------------------------------------------|-------|
|      |                                                                                             | CITAM+                                          |       |
|      |                                                                                             | CHAZ                                            |       |
|      |                                                                                             | AFYA                                            |       |
|      |                                                                                             | Jhpiego                                         |       |
|      |                                                                                             | Other (specify)                                 |       |
| 221. | How long was the training?                                                                  | 1 day                                           |       |
|      |                                                                                             | 2 days                                          |       |
|      |                                                                                             | 3 days                                          |       |
|      |                                                                                             | 5 days                                          |       |
|      |                                                                                             | More than 5 days                                |       |
| 222. | What modules or training curriculum was used?                                               | MoH TS modules                                  |       |
|      |                                                                                             | WHO modules                                     |       |
|      |                                                                                             | Other (specify)                                 |       |
|      |                                                                                             | Not sure                                        |       |
| 223. | What are some of the TB activities CBVs conduct at the facility and in the community?       | Community sensitization                         |       |
|      |                                                                                             | Monitoring of treatment                         |       |
|      |                                                                                             | Compilation and submission of community reports |       |
|      |                                                                                             | Identification and referral of presumptive      |       |
|      |                                                                                             | Contact tracing                                 |       |
|      |                                                                                             | Other (specify)                                 |       |
| 224. | How are CBVs assigned tasks and distributed in your facility                                | ART                                             |       |
|      |                                                                                             | TB clinic                                       |       |
|      |                                                                                             | OPD                                             |       |
|      |                                                                                             | MCH                                             |       |
|      |                                                                                             | IPD                                             |       |
|      |                                                                                             | Registry                                        |       |
|      |                                                                                             | Other (specify)                                 |       |
|      | What tools are available to CBVs to account/ document their contribution to the activities? | Community presumptive registers                 |       |
|      |                                                                                             | Community referral forms                        |       |
|      |                                                                                             | Community CBV reports                           |       |
|      |                                                                                             | CBV monthly report                              |       |
|      |                                                                                             | TB treatment register                           |       |
|      |                                                                                             | Other (specify)                                 |       |
| 225. | Do Community Volunteers produce any activity reports?                                       | [ Y ]                                           | [ N ] |
| 226. | Do Community Volunteers receive stipends or any other incentives?                           | [ Y ]                                           | [ N ] |
| 227. | Are there any community-based groups of former TB patients?                                 | [ Y ]                                           | [ N ] |
| 228. |                                                                                             | CHAZ                                            |       |

|      |                                                                                                                                                                                         |                           |       |
|------|-----------------------------------------------------------------------------------------------------------------------------------------------------------------------------------------|---------------------------|-------|
|      | What other partners support Community TB in your facility/district                                                                                                                      | MoH/GF                    |       |
|      |                                                                                                                                                                                         | JSI                       |       |
|      |                                                                                                                                                                                         | Right to Care             |       |
|      |                                                                                                                                                                                         | CITAM+                    |       |
|      |                                                                                                                                                                                         | AFYA                      |       |
|      |                                                                                                                                                                                         | Jhiego                    |       |
|      |                                                                                                                                                                                         | Other (specify)           |       |
| 229. |                                                                                                                                                                                         | Nil                       |       |
| 230. | In your district are there any existing partnerships with community radio stations to air health Programmes?                                                                            | [ Y ]                     | [ N ] |
| 231. | How many community radio stations do you have in your district?                                                                                                                         | Nil                       |       |
|      |                                                                                                                                                                                         | 1                         |       |
|      |                                                                                                                                                                                         | 2                         |       |
|      |                                                                                                                                                                                         | 3                         |       |
|      |                                                                                                                                                                                         | 4                         |       |
|      |                                                                                                                                                                                         | 5                         |       |
|      |                                                                                                                                                                                         | <5                        |       |
| 232. | What are some of the issues prevailing in your catchment that hinder people from accessing TB services at facilities                                                                    | Distance                  |       |
|      |                                                                                                                                                                                         | Culture beliefs           |       |
|      |                                                                                                                                                                                         | Gender                    |       |
|      |                                                                                                                                                                                         | HCW attitude              |       |
|      |                                                                                                                                                                                         | Other (specify)           |       |
| 233. | Are there specific issues (stigma, myths and misconceptions, occupational routines and social issues) concerning men and women that hinder their access to TB services. Please itemize. | Stigma                    |       |
|      |                                                                                                                                                                                         | Myths                     |       |
|      |                                                                                                                                                                                         | Misconceptions            |       |
|      |                                                                                                                                                                                         | Occupational Routines     |       |
|      |                                                                                                                                                                                         | Social                    |       |
|      |                                                                                                                                                                                         | Other (specify)           |       |
| 234. | What support structures exist in your catchment for TB patients                                                                                                                         | Nil                       |       |
|      |                                                                                                                                                                                         | Private hospital          |       |
|      |                                                                                                                                                                                         | Chemistry/pharmacy        |       |
|      |                                                                                                                                                                                         | Treatment both            |       |
|      |                                                                                                                                                                                         | NHC                       |       |
|      |                                                                                                                                                                                         | TB support group          |       |
|      |                                                                                                                                                                                         | Treatment supporters/CBVs |       |
|      |                                                                                                                                                                                         | Other (specify)           |       |
| 235. | Are there any active community nutritional support groups within your catchment area or district?                                                                                       | [ Y ]                     | [ N ] |
| 236. | What kind of livelihood and income generating activities that exist in your community                                                                                                   | Public services           |       |
|      |                                                                                                                                                                                         | Mining                    |       |
|      |                                                                                                                                                                                         | Fishing                   |       |
|      |                                                                                                                                                                                         | Farming                   |       |
|      |                                                                                                                                                                                         | Other (specify)           |       |
|      |                                                                                                                                                                                         | Other (specify)           |       |
| 237. | How do CBVs participate in these activities to support them financially?                                                                                                                | Nil                       |       |
|      |                                                                                                                                                                                         | Public services           |       |
|      |                                                                                                                                                                                         | Mining                    |       |

|      |                                                                                                                                 |                     |       |
|------|---------------------------------------------------------------------------------------------------------------------------------|---------------------|-------|
|      |                                                                                                                                 | Fishing             |       |
|      |                                                                                                                                 | Farming             |       |
|      |                                                                                                                                 | Other (specify)     |       |
| 238. | Are there any congregate settings in your community/district that exposes people to the risk of TB                              | [ Y ]               | [ N ] |
| 239. | What are some of the specific behaviors can you share that increase the risk to TB in your community                            | Nil                 |       |
|      |                                                                                                                                 | Overcrowding        |       |
|      |                                                                                                                                 | Mining              |       |
|      |                                                                                                                                 | Smoking             |       |
|      |                                                                                                                                 | beer drinking       |       |
|      |                                                                                                                                 | Other (specify)     |       |
|      |                                                                                                                                 | Other (specify)     |       |
| 240. | What are some of the challenges do you experience in your community that affect your implementation of community TB activities. | Nil                 |       |
|      |                                                                                                                                 | Traditional healers |       |
|      |                                                                                                                                 | Churches            |       |
|      |                                                                                                                                 | Social              |       |
|      |                                                                                                                                 | Traditional leaders |       |
|      |                                                                                                                                 | distance            |       |
|      |                                                                                                                                 | Few CBVs            |       |
|      |                                                                                                                                 | Other (specify)     |       |

| Baseline Performance Trend Analysis |                                                        |          |          |          |          |                     |          |          |          |                  |          |          |          |                       |          |          |          |
|-------------------------------------|--------------------------------------------------------|----------|----------|----------|----------|---------------------|----------|----------|----------|------------------|----------|----------|----------|-----------------------|----------|----------|----------|
|                                     |                                                        | 2021     |          |          |          | January -March 2022 |          |          |          | April -June 2022 |          |          |          | July - September 2022 |          |          |          |
|                                     |                                                        | F<br>15+ | M<br>15+ | F<br><15 | M<br><15 | F<br>15+            | M<br>15+ | F<br><15 | M<br><15 | F<br>15+         | M<br>15+ | F<br><15 | M<br><15 | F<br>15+              | M<br>15+ | F<br><15 | M<br><15 |
| <b>TB Case Detection</b>            |                                                        |          |          |          |          |                     |          |          |          |                  |          |          |          |                       |          |          |          |
| 241.                                | Facility attendance                                    |          |          |          |          |                     |          |          |          |                  |          |          |          |                       |          |          |          |
| 242.                                | Presumptive TB cases                                   |          |          |          |          |                     |          |          |          |                  |          |          |          |                       |          |          |          |
| 243.                                | TB sample submitted                                    |          |          |          |          |                     |          |          |          |                  |          |          |          |                       |          |          |          |
| 244.                                | TB Samples tested with Xpert                           |          |          |          |          |                     |          |          |          |                  |          |          |          |                       |          |          |          |
| 245.                                | TB Samples tested with microscopy                      |          |          |          |          |                     |          |          |          |                  |          |          |          |                       |          |          |          |
| 246.                                | TB Samples tested with Urine LAM                       |          |          |          |          |                     |          |          |          |                  |          |          |          |                       |          |          |          |
| 247.                                | Number diagnosed with TB                               |          |          |          |          |                     |          |          |          |                  |          |          |          |                       |          |          |          |
| 248.                                | Started on ATT                                         |          |          |          |          |                     |          |          |          |                  |          |          |          |                       |          |          |          |
| <b>TB/HIV</b>                       |                                                        |          |          |          |          |                     |          |          |          |                  |          |          |          |                       |          |          |          |
| 249.                                | Total notifications                                    |          |          |          |          |                     |          |          |          |                  |          |          |          |                       |          |          |          |
| 250.                                | Number started on Treatment(Bact+Clinically diagnosed) |          |          |          |          |                     |          |          |          |                  |          |          |          |                       |          |          |          |
| 251.                                | Number with documented HIV status                      |          |          |          |          |                     |          |          |          |                  |          |          |          |                       |          |          |          |
| 252.                                | HIV positive                                           |          |          |          |          |                     |          |          |          |                  |          |          |          |                       |          |          |          |
| 253.                                | No of HIV positive with ART start date                 |          |          |          |          |                     |          |          |          |                  |          |          |          |                       |          |          |          |

| TREATMENT OUTCOMES |                     |                              |                   |   |      |   |                  |   |                   |   |             |   |
|--------------------|---------------------|------------------------------|-------------------|---|------|---|------------------|---|-------------------|---|-------------|---|
|                    | Period of Enrolment | Number enrolled on treatment | Treatment success |   | Died |   | Treatment failed |   | Loss to follow-up |   | Unevaluated |   |
|                    |                     |                              | F                 | M | F    | M | F                | M | F                 | M | F           | M |
| 254.               | 2020                |                              |                   |   |      |   |                  |   |                   |   |             |   |
| 255.               | Q1 (Jan – Mar) 2021 |                              |                   |   |      |   |                  |   |                   |   |             |   |
| 256.               | Q2(Apr -Jun) 2021   |                              |                   |   |      |   |                  |   |                   |   |             |   |
| 257.               | Q3(Jul – Sep) 2021  |                              |                   |   |      |   |                  |   |                   |   |             |   |

| INDICATORS                |                                                                                                                                                         | 2021 | January - March 2022 | April -June 2022 | July - September 2022 |
|---------------------------|---------------------------------------------------------------------------------------------------------------------------------------------------------|------|----------------------|------------------|-----------------------|
| <b>DR TB SURVEILLANCE</b> |                                                                                                                                                         |      |                      |                  |                       |
| 258.                      | No of high risk for DR-TB (retreatment cases, smear positive at month 2 and after, develop TB after TPT, presumptive TB patients who contacts to DR-TB) |      |                      |                  |                       |
| 259.                      | Number of high-risk for DR-TB cases with access to Xpert (with Xpert results documented)                                                                |      |                      |                  |                       |
| 260.                      | Number of High-risk for DR-TB with evidence of request for culture/ DST (samples sent for culture and DST)                                              |      |                      |                  |                       |
| 261.                      | Number of High-risk for DR-TB cases with Culture/DST results                                                                                            |      |                      |                  |                       |
| <b>CONTACT TRACING</b>    |                                                                                                                                                         |      |                      |                  |                       |
| 262.                      | Bacteriologically confirmed TB cases                                                                                                                    |      |                      |                  |                       |
| 263.                      | Households screened for TB                                                                                                                              |      |                      |                  |                       |
| 264.                      | Presumptive TB cases                                                                                                                                    |      |                      |                  |                       |
| 265.                      | Presumptive TB cases that submitted sample for evaluation                                                                                               |      |                      |                  |                       |
| 266.                      | Diagnosed with TB                                                                                                                                       |      |                      |                  |                       |
| 267.                      | Started on ATT                                                                                                                                          |      |                      |                  |                       |
| 268.                      | Under 5 contacts initiated on TPT                                                                                                                       |      |                      |                  |                       |



| MDR/RR TB PATIENT CARE (skip Q196-202)) if facility is not an MDR TB initiating Centre |                                                                                                | 2021                                             |      |      |      | January to March 2022                            |      |      |      | April to June 2022                                          |      |      |      | July - Sep 2022                                  |      |      |      | COMMENT |
|----------------------------------------------------------------------------------------|------------------------------------------------------------------------------------------------|--------------------------------------------------|------|------|------|--------------------------------------------------|------|------|------|-------------------------------------------------------------|------|------|------|--------------------------------------------------|------|------|------|---------|
|                                                                                        |                                                                                                | M<15                                             | F<15 | M>15 | F>15 | M<15                                             | F<15 | M>15 | F>15 | M<15                                                        | F<15 | M>15 | F>15 | M<15                                             | F<15 | M>15 | F>15 |         |
| 269.                                                                                   | No of MDR/RR TB patients detected at a facility                                                |                                                  |      |      |      |                                                  |      |      |      |                                                             |      |      |      |                                                  |      |      |      |         |
| 270.                                                                                   | No of MDR/RR TB patients started on treatment at a facility                                    |                                                  |      |      |      |                                                  |      |      |      |                                                             |      |      |      |                                                  |      |      |      |         |
| 271.                                                                                   | No of MDR/RR patients started on standardized oral longer treatment regimen                    |                                                  |      |      |      |                                                  |      |      |      |                                                             |      |      |      |                                                  |      |      |      |         |
| 272.                                                                                   | No of MDR/RR patients started on standardized oral shorter treatment regimen                   |                                                  |      |      |      |                                                  |      |      |      |                                                             |      |      |      |                                                  |      |      |      |         |
| 273.                                                                                   | No of MDR/RR patients started on individualized treatment regimen                              |                                                  |      |      |      |                                                  |      |      |      |                                                             |      |      |      |                                                  |      |      |      |         |
| 274.                                                                                   | No of XDR TB patients                                                                          |                                                  |      |      |      |                                                  |      |      |      |                                                             |      |      |      |                                                  |      |      |      |         |
| 275.                                                                                   | Number contact traced                                                                          |                                                  |      |      |      |                                                  |      |      |      |                                                             |      |      |      |                                                  |      |      |      |         |
| 276.                                                                                   | No of patients on treatment with baseline DST                                                  |                                                  |      |      |      |                                                  |      |      |      |                                                             |      |      |      |                                                  |      |      |      |         |
| 277.                                                                                   | Number of patients on treatment with up to date culture results (2 months before current date) |                                                  |      |      |      |                                                  |      |      |      |                                                             |      |      |      |                                                  |      |      |      |         |
| 278.                                                                                   | Number of patients with documented adverse drug safety monitoring and management               |                                                  |      |      |      |                                                  |      |      |      |                                                             |      |      |      |                                                  |      |      |      |         |
|                                                                                        | <b>MDR Outcomes</b>                                                                            | MDR/RR- TB patient who Started treatment in 2018 |      |      |      | MDR/RR- TB patient who Started treatment in 2019 |      |      |      | MDR/RR- TB patient who Started 2020 (Jan to Mar, Apr – Jun) |      |      |      | MDR/RR- TB patient who Started 2020 (Jul to Sep) |      |      |      |         |
|                                                                                        |                                                                                                | M<15                                             | F<15 | M>15 | F>15 | M<15                                             | F<15 | M>15 | F>15 | M<15                                                        | F<15 | M>15 | F>15 | M<15                                             | F<15 | M>15 | F>15 |         |
| 279.                                                                                   | No. of Patients enrolled on DR TB Treatment                                                    |                                                  |      |      |      |                                                  |      |      |      |                                                             |      |      |      |                                                  |      |      |      |         |

|      |                                                                    |  |  |  |  |  |  |  |  |  |  |  |  |  |  |  |
|------|--------------------------------------------------------------------|--|--|--|--|--|--|--|--|--|--|--|--|--|--|--|
| 280. | No of patients who completed treatment/cured (Treatment success)   |  |  |  |  |  |  |  |  |  |  |  |  |  |  |  |
| 281. | Number of patients who died                                        |  |  |  |  |  |  |  |  |  |  |  |  |  |  |  |
| 282. | No. of patients attending their semi-annual post treatment reviews |  |  |  |  |  |  |  |  |  |  |  |  |  |  |  |

| Laboratory Indicators<br>(Skip section if facility is not a diagnostic site) |                                | 2021         | January to March 2022 | April to June 2022 | July - Sep 2022 | COM<br>MENT | 2021 | Jan to March 2022 | April to June 2022 | July - Sep 2022 | COM<br>MENT |  |
|------------------------------------------------------------------------------|--------------------------------|--------------|-----------------------|--------------------|-----------------|-------------|------|-------------------|--------------------|-----------------|-------------|--|
|                                                                              |                                | <b>Xpert</b> |                       |                    |                 |             |      | <b>Microscopy</b> |                    |                 |             |  |
| 283.                                                                         | Number of TB samples received  |              |                       |                    |                 |             |      |                   |                    |                 |             |  |
| 284.                                                                         | Number of TB samples processed |              |                       |                    |                 |             |      |                   |                    |                 |             |  |
| 285.                                                                         | TB detected                    |              |                       |                    |                 |             |      |                   |                    |                 |             |  |
| 286.                                                                         | Rifampicin resistance detected |              |                       |                    |                 |             |      |                   |                    |                 |             |  |
| 287.                                                                         | Average Turnaround time (Days) |              |                       |                    |                 |             |      |                   |                    |                 |             |  |

| <b>WASTE MANAGEMENT AND ENVIRONMENTAL RISK ASSEMENT</b> |                                                                                |                                                                                                                |       |                                    |
|---------------------------------------------------------|--------------------------------------------------------------------------------|----------------------------------------------------------------------------------------------------------------|-------|------------------------------------|
|                                                         | Staff                                                                          | AVAILABILITY                                                                                                   |       | COMMENT                            |
| 288.                                                    | Have health care workers at the TB clinic been trained on waste management?    | [ Y ]                                                                                                          | [ N ] | If yes, how many have been trained |
| 289.                                                    | Which kind of waste is generated in relation to TB service provision           | [1] general<br>[2] infectious<br>[3] sharps<br>[4] chemicals<br>[5] pharmaceutical waste                       |       |                                    |
| 290.                                                    | Quantity of general waste produced/day (estimated, kg)                         |                                                                                                                |       |                                    |
| 291.                                                    | Quantity of infectious waste produced/day (estimated, kg)                      |                                                                                                                |       |                                    |
| 292.                                                    | Number of sharps boxes used/ day                                               |                                                                                                                |       |                                    |
| 293.                                                    | Quantity of chemical waste produced/day (estimated, kg)                        |                                                                                                                |       |                                    |
| 294.                                                    | Quantity of pharmaceutical waste produced/day (estimated, kg)                  |                                                                                                                |       |                                    |
| 295.                                                    | Into which categories are medical waste separated? (tick all those that apply) | [0] no segregation<br>[1] general<br>[2] infectious<br>[3] sharps<br>[4] chemicals<br>[5] pharmaceutical waste |       |                                    |
| 296.                                                    | Proper segregation of waste is:                                                | [0] non-existent<br>[1] bad (low)<br>[2] insufficient<br>[3] satisfactory<br>[4] good<br>[5] excellent (high)  |       |                                    |
| 297.                                                    | safe handling of waste is:                                                     | [0] non-existent<br>[1] bad (low)<br>[2] insufficient                                                          |       |                                    |

|      |                                                                               |                                                                                                               |   |
|------|-------------------------------------------------------------------------------|---------------------------------------------------------------------------------------------------------------|---|
|      |                                                                               | [3] satisfactory<br>[4] good<br>[5] excellent (high)                                                          |   |
| 298. | what kind of specific containers do you use?                                  | [0] no specific container;<br>[1] plastic<br>[2] metallic<br>[3] cardboard<br>[4] bag<br>[5] box<br>[6] other |   |
| 299. | For what reasons are there shortages, if any?                                 | [0] no shortages<br>[1] budget<br>[2] logistical<br>[3] other (specify)                                       |   |
| 300. | Do you have a specific color-coding system?                                   | Y                                                                                                             | N |
| 301. | Is infectious waste container are lidded?                                     | Y                                                                                                             | N |
| 302. | Do you have a specific area for medical waste storage?                        | Y                                                                                                             | N |
| 303. | Is the area only accessible for authorized persons.                           | Y                                                                                                             | N |
| 304. | Are different kind of waste stored in separated storage areas?                | Y                                                                                                             | N |
| 305. | Is hazardous and non-hazardous waste collected and transported separately?    | Y                                                                                                             | N |
| 306. | What kind of means do you use?                                                | [0] open device<br>[1] closed device<br>[2] other (specify)                                                   |   |
| 307. | Do you think current practices offer enough security?                         | Y                                                                                                             | N |
| 308. | who generally transports the medical waste?                                   | [0] the HCF<br>[1] municipal service<br>[2] private company (name?)                                           |   |
| 309. | which kind of system is used for waste treatment?                             | [0] none<br>[1] open fire<br>[2] incinerator<br>[3] chem. Disinf<br>[4] other                                 |   |
| 310. | What is the current capacity of the waste treatment system(s) in kg/day?      |                                                                                                               |   |
| 311. | How often treatment is done per week                                          |                                                                                                               |   |
| 312. | Any operation problems of the waste treatment system; if so for what reasons? | [0] none<br>[1] money<br>[2] maintenance<br>[3] spare parts<br>[4] other                                      |   |

|      |                                                  |                                                                                         |
|------|--------------------------------------------------|-----------------------------------------------------------------------------------------|
| 313. | What do you do when it doesn't function?         |                                                                                         |
| 314. | Is the waste disposal system on or off-site?     | [0] on-site<br>[1] off-site                                                             |
| 315. | which kind of disposal site is used for the HCW? | [0] none<br>[1] open dump<br>[2] sanitary landfill<br>[3] small burial pit<br>[4] other |
| 316. | Is the disposal area secured?                    | Y N                                                                                     |

| Current partner support |         |                                                                                            |                                   |   |                                     |
|-------------------------|---------|--------------------------------------------------------------------------------------------|-----------------------------------|---|-------------------------------------|
|                         | Partner | Area of support (tick all areas of support)                                                | Requirement of additional support |   | Specify additional support required |
| 317.                    |         | [1] Strengthening TB lab services                                                          | Y                                 | N |                                     |
|                         |         | [2] Facility TB case finding                                                               | Y                                 | N |                                     |
|                         |         | [3] Community TB case finding                                                              | Y                                 | N |                                     |
|                         |         | [4] Increasing MDR TB case detection                                                       | Y                                 | N |                                     |
|                         |         | [5] improving MDR TB treatment outcomes                                                    | Y                                 | N |                                     |
|                         |         | [6] Public private partnership                                                             | Y                                 | N |                                     |
|                         |         | [7] Improved use of data for decision making including roll out of TB module for SmartCare | Y                                 | N |                                     |
| 318.                    |         | [1] Strengthening TB lab services                                                          | Y                                 | N |                                     |
|                         |         | [2] Facility TB case finding                                                               | Y                                 | N |                                     |
|                         |         | [3] Community TB case finding                                                              | Y                                 | N |                                     |
|                         |         | [4] Increasing MDR TB case detection                                                       | Y                                 | N |                                     |
|                         |         | [5] improving MDR TB treatment outcomes                                                    | Y                                 | N |                                     |
|                         |         | [6] Public private partnership                                                             | Y                                 | N |                                     |
|                         |         | [7] Improved use of data for decision making including roll out of TB module for SmartCare | Y                                 | N |                                     |
| 319.                    |         | [1] Strengthening TB lab services                                                          | Y                                 | N |                                     |
|                         |         | [2] Facility TB case finding                                                               | Y                                 | N |                                     |
|                         |         | [3] Community TB case finding                                                              | Y                                 | N |                                     |
|                         |         | [4] Increasing MDR TB case detection                                                       | Y                                 | N |                                     |
|                         |         | [5] improving MDR TB treatment outcomes                                                    | Y                                 | N |                                     |
|                         |         | [6] Public private partnership                                                             | Y                                 | N |                                     |
|                         |         | [7] Improved use of data for decision making including roll out of TB module for SmartCare | Y                                 | N |                                     |
| 320.                    |         | [1] Strengthening TB lab services                                                          | Y                                 | N |                                     |
|                         |         | [2] Facility TB case finding                                                               | Y                                 | N |                                     |
|                         |         | [3] Community TB case finding                                                              | Y                                 | N |                                     |
|                         |         | [4] Increasing MDR TB case detection                                                       | Y                                 | N |                                     |
|                         |         | [5] improving MDR TB treatment outcomes                                                    | Y                                 | N |                                     |
|                         |         | [6] Public private partnership                                                             | Y                                 | N |                                     |
|                         |         | [7] Improved use of data for decision making including roll out of TB module for SmartCare | Y                                 | N |                                     |

COMMENTS

Assessed By: .....

Position..... Date:.....

Facility staff Name: .....

Position:..... Date:.....
